# Supplementary material for: The soybean GmSNAP18 gene underlies two types of resistance to soybean cyst nematode
Source: PubMed Central journal article supplement (PMC5378975; doi:10.1038/ncomms14822), 2017-03-27
Supplement: ncomms14822-s1.pdf [file ncomms14822-s1.pdf]

**a**

Forrest MRALAAQFSNYLCRRKVGVNLRNRFSSYNSKDELTIIEEEAERKVGWLLKTIFFVTAGVA  
Essex MRALAAQFSNYLCRRKVGVNLRNRFSSYNSKDELTIIEEEAERKVGWLLKTIFFVTAGVA  
\*\*\*\*\*  
  
Forrest GYHFFPYMGENLMQQSVSLLRVKDPLFKRMGASRLARFAVDDERRKKIVEMGGAQELLNM  
Essex GYHFFPYMGENLMQQSVSLLRVKDPLFKRMGASRLARFAVDDERRKKIVEMGGAQELLNM  
\*\*\*\*\*  
  
Forrest LSTAKDDRTRKEALHALDALSQSDEALASLHHAGAISVIRSAPNSLEDAEVEGFKLSLMK  
Essex LSTAKDDRTRKEALHALDALSQSDEALASLHHAGAISVIRSAPNSLEDAEVEGFKLSLMK  
\*\*\*\*\*  
  
Forrest RFQDLRYDVPS  
Essex RFQDLRYDVPS  
\*\*\*\*\*

**b**

Forrest MSPAAGVSVPLLGD SKGTPPPASVPGAVFNVATSIVGAGIMSIPAIMKVLGVVPAFAMIL  
Essex MSPAAGVSVPLLGD SKGTPPPASVPGAVFNVATSIVGAGIMSIPAIMKVLGVVPAFAMIL  
\*\*\*\*\*  
  
Forrest VVAVLAELSVDFLMRFTHSGETTTTYAGVMREAFGSGGALAAQVCVIITNVGGLILYLI I I  
Essex VVAVLAELSVDFLMRFTHSGETTTTYAGVMREAFGSGGALAAQVCVIITNVGGLILYLI I I  
\*\*\*\*\*  
  
Forrest GDVLSGKQNGGEVHLGILQQWFGIHWNSREFALLFTLVFVMLPLVLYKRVESLKYSSAV  
Essex GDVLSGKQNGGEVHLGILQQWFGIHWNSREFALLFTLVFVMLPLVLYKRVESLKYSSAV  
\*\*\*\*\*  
  
Forrest STLLAVAFVIGICCGLAITLVQGKTQTPRFLPRLDYQTSFFDLFTAVPVVVTAFTHFHN  
Essex STLLAVAFVIGICCGLAITLVQGKTQTPRFLPRLDYQTSFFDLFTAVPVVVTAFTHFHN  
\*\*\*\*\*  
  
Forrest HPIGFELAKASQMTTAVRLALLLCAVIYLAIGLFGYMLFGDSTQSDILINFDQNAGSAVG  
Essex HPIGFELAKASQMTTAVRLALLLCAVIYLAIGLFGYMLFGDSTQSDILINFDQNAGSAVG  
\*\*\*\*\*  
  
Forrest SLLNSLVRVSYALHIMLVFPLLNFSLRTNIDEVLFPPKPLATDNKRFMILTLLVLLVFSY  
Essex SLLNSLVRVSYALHIMLVFPLLNFSLRTNIDEVLFPPKPLATDNKRFMILTLLVLLVFSY  
\*\*\*\*\*  
  
Forrest LAAIAIPDIWYFFQFLGSSAVCLAFIFPGSIVLRDVKGISTRDKIIALIMIILAVVTS  
Essex LAAIAIPDIWYFFQFLGSSAVCLAFIFPGSIVLRDVKGISTRDKIIALIMIILAVVTS  
\*\*\*\*\*  
  
Forrest VLAISTNIYNAFSSKS  
Essex VLAISTNIYNAFSSKS  
\*\*\*\*\*

**Supplementary Figure 1. The predicted protein sequences of Glyma18g02570 and Glyma18g02580 in Forrest and Essex. (a) Alignment of the predicted protein sequences of Glyma18g02570 in Forrest and Essex; (b) Alignment of the predicted protein sequences of Glyma18g02580 in Forrest and Essex.**

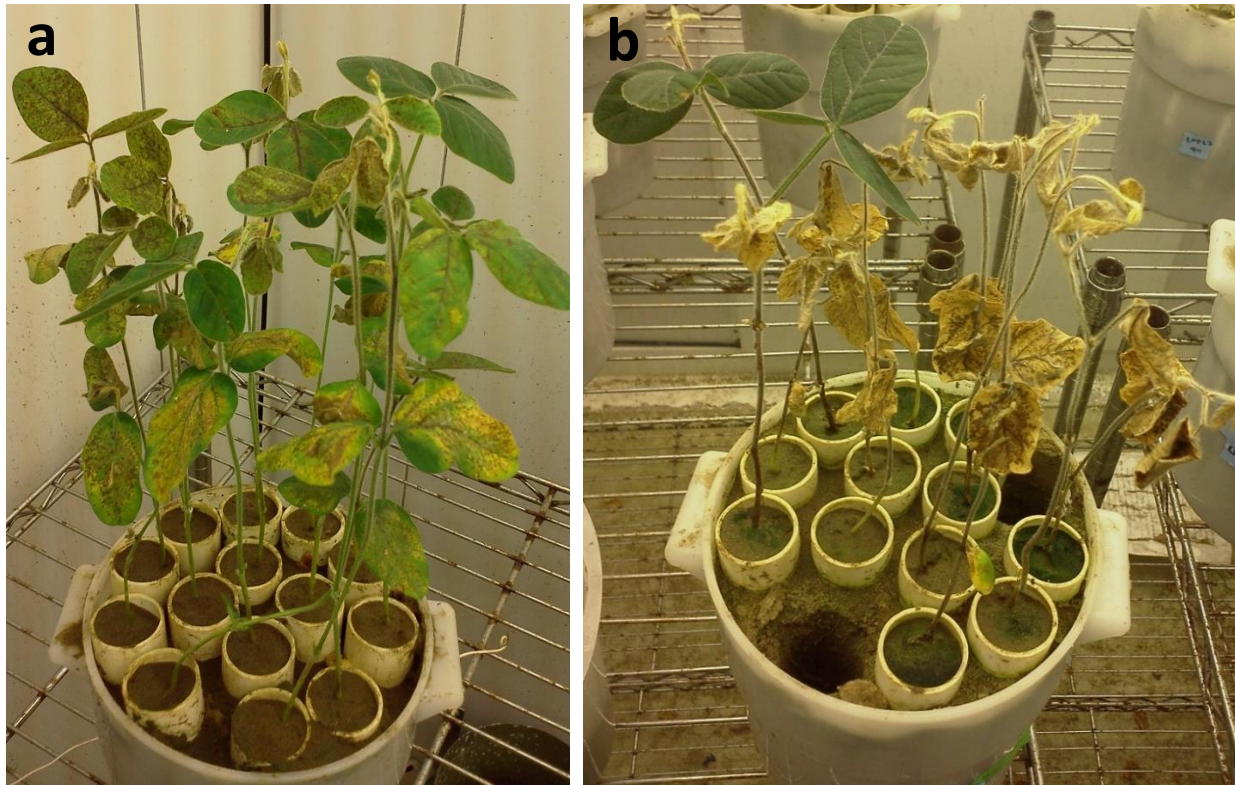

**Supplementary Figure 2. Plant growth of RIL ExF67 (*GmSNAP18*<sup>+</sup>/*GmSHMT08*<sup>+</sup>) inoculated with BPMV-Forrest *GmSNAP18*. (a) 16 days post VIGS infection. (b) 30 days post VIGS infection.**

a

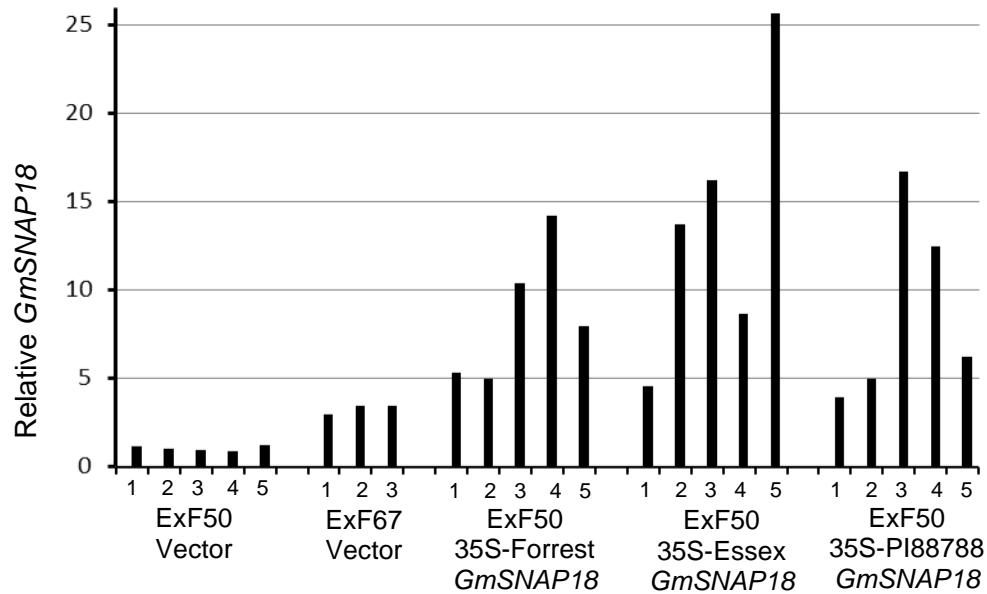

b

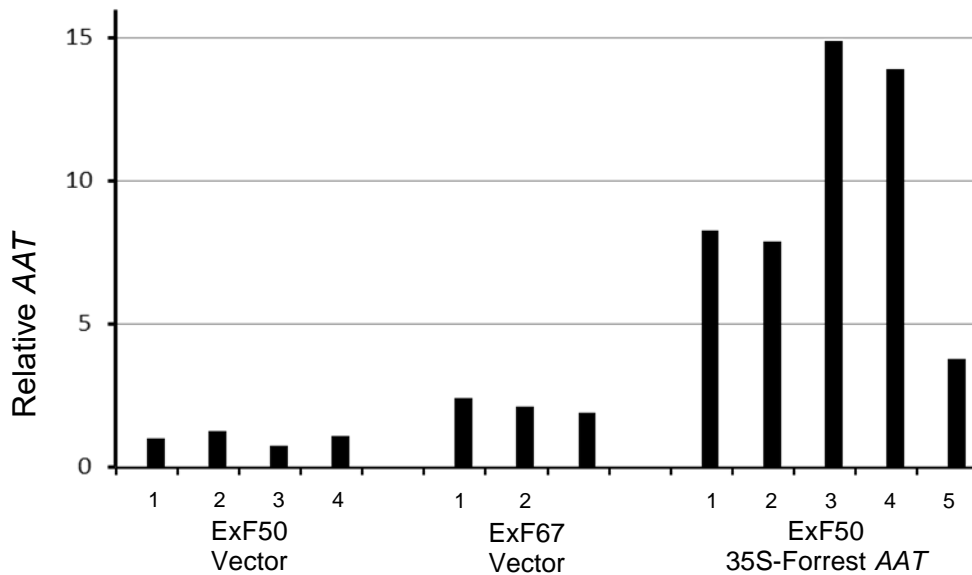

**Supplementary Figure 3. Expression analysis of transgenic hairy roots.** (a) Expression of Forrest *GmSNAP18* in ExF50 (*GmSNAP18*<sup>-</sup>/*GmSHMT08*<sup>+</sup>) *GmSNAP18* transgenic hairy roots. Numbers denote independent lines used for the analysis. Data is relative to the Forrest *GmSNAP18* expression in one of the ExF50 vector control roots. (b) Expression analysis of AAT in ExF50 AAT transgenic hairy roots. Numbers denote independent lines used for the analysis. Data is relative to the expression in one of the ExF50 vector control roots. ExF67 (*GmSNAP18*<sup>+</sup>/*GmSHMT08*<sup>+</sup>) was taken as the control. The qPCR primers used for the expression analysis are listed in the primer table (Supplementary Table 1).

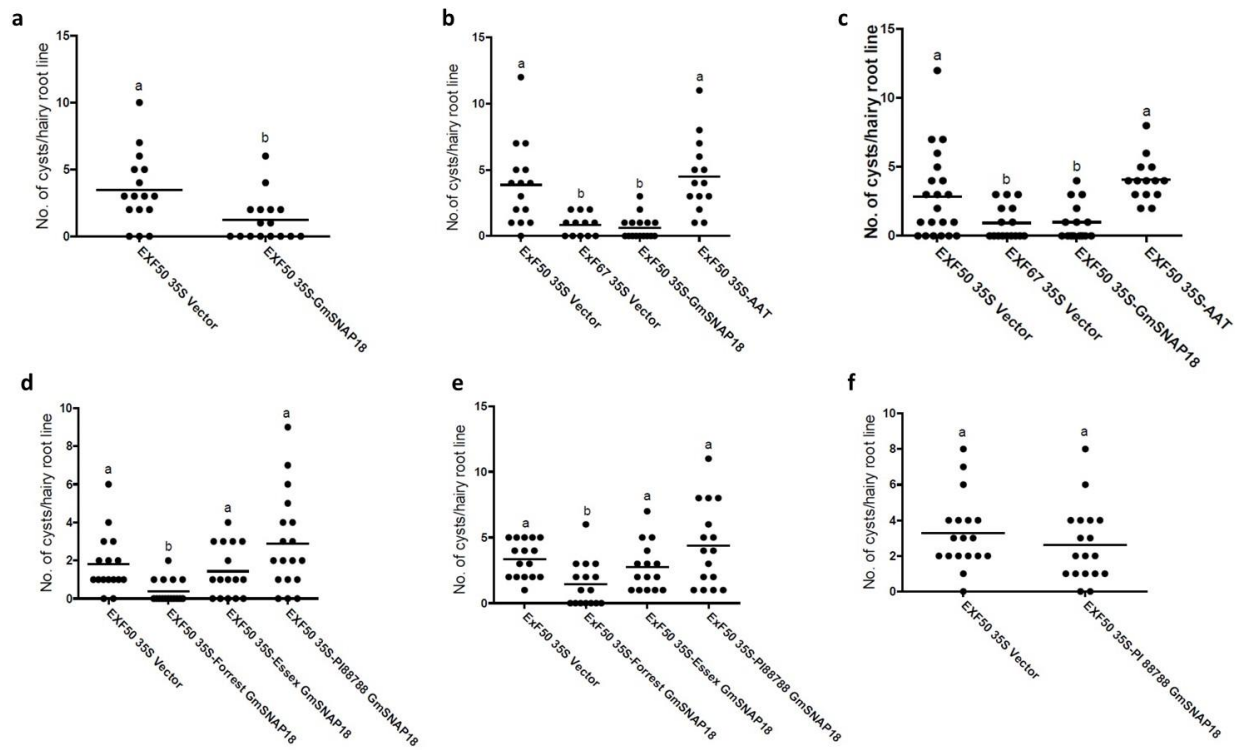

**Supplementary Figure 4. Replicate experimental data for nematode infection assays.** (a) SCN infection of RIL ExF50 transgenic hairy roots expressing Forrest *GmSNAP18*. (b) and (c) SCN infection of RIL ExF50 transgenic hairy roots expressing Forrest *GmSNAP18* or AAT. (d), (e) and (f) SCN infection of RIL ExF50 transgenic hairy roots expressing *GmSNAP18* of Forrest, Essex or PI 88788. *GmSNAP18* refers to Forrest-*GmSNAP18*, if not indicated otherwise. Significantly different experimental results obtained by an unpaired *t*-test are denoted by different letters ( $P < 0.05$ , range from 0.04 to 0.0004). Each dot denotes cyst number from an independent hairy line ( $n \geq 12$ ).

**Supplementary Table 1** The primers used in this study except the primers employed for RSE-Seq. Some of primers referred to the Supplementary References, and the left were designed and developed in this study.

**I. Primers for screening of *rhg1-a* recombinants and genotyping of *Rhg4***

---

***rhg1***

|                          |                                                                        |
|--------------------------|------------------------------------------------------------------------|
| Sat_210 <sup>4</sup>     | Forward: GCGCCAGCAACAAAGTTCCTGACAAA<br>Reverse: GCGCATGCAAATGAAATAATAA |
| Satt309 <sup>4</sup>     | Forward: GCGCCTTCAAATTGGCGTCTT<br>Reverse: GCGCCTTAAATAAAACCCGAAACT    |
| SIUC-SAT143 <sup>1</sup> | Forward: TGTTACTTAGTAATTATGAAG<br>Reverse: AATAATGATTTGTTGATCGAT       |

***Rhg4***

|                       |                                                                        |
|-----------------------|------------------------------------------------------------------------|
| Satt632 <sup>4</sup>  | Forward: GGGCTATGAAGGGAATGGAAAGGA<br>Reverse: CCCATATTGAAGATTTGAAGTAAT |
| Sat_162 <sup>4</sup>  | Forward: GCGTGGTTTTTCGCTGGATATA<br>Reverse: GCGCATTCGTAACATATTTTTTAC   |
| GMES6186 <sup>3</sup> | Forward: AGCGGGAATTGAAGGTTTT<br>Reverse: GGAATCTCATCTGAAATAATGGA       |

---

**II. Primers for high density genetic mapping of *rhg1-a* recombinants and haplotyping of soybean lines**

---

***rhg1***

|                      |                                                                        |
|----------------------|------------------------------------------------------------------------|
| Sat_210 <sup>4</sup> | Forward: GCGCCAGCAACAAAGTTCCTGACAAA<br>Reverse: GCGCATGCAAATGAAATAATAA |
| 5601                 | Forward: TTA CTTTTGGTCAGCATT TGGC<br>Reverse: TATTGTTGATATATTATATTGTCC |
| 5701                 | Forward: ACCTTTTTGCAGTATTTATGC<br>Reverse: CTAGGTA ACTCTTTTAGCCGTGA    |
| 580                  | Forward: GACCAAGGTGAAAAGCAAAGCA<br>Reverse: ATAGTAGGCTGCCAGGCACCG      |
| 590                  | Forward: ATGGCCGATCAGTTATCGAAGGG<br>Reverse: ACCCAGGAGAAGAGATATCAATA   |
| 600                  | Forward: GAAATGCATGGTTTGAAGTAAAC<br>Reverse: GACAGAGTTAATGTCTATAGTAT   |
| 610                  | Forward: GTTTGGTTTGGTTACTTGAAAATC<br>Reverse: GGCATCATCACAACCCAACT     |
| 10                   | Forward: CTCTAACCATTTGACTTGTTC<br>Reverse: ATGAGTCTATGACCATACCCT       |
| 12                   | Forward: CAAAAGTCTGACTTAAAAGTCTC<br>Reverse: GTCGTCTGTAGACTGATACAG     |
| 122452               | Forward: CGCAAAC TTTATTGTGTTCC TAGTC                                   |

|                          |                                                                                                       |
|--------------------------|-------------------------------------------------------------------------------------------------------|
| TMD1                     | Reverse: TGACCCACCTGATAAAATGTAGT<br>Forward: AAAC TAGTCCATTTTGATGGA<br>Reverse: AGCATTTGTATTCTCATCAAG |
| Satt309 <sup>4</sup>     | Forward: GCGCCTTCAAATTGGCGTCTT<br>Reverse: GCGCCTTAAATAAAACCCGAAACT                                   |
| 375912                   | Forward: TGCTCTCAACTCATGCTCCTAC<br>Reverse: ACTTGGTGCTTCTTGGATTGTG                                    |
| 122592                   | Forward: GCCGTCTTCTTTTTCTTTTTCACTTTCTAA<br>Reverse: TGTTGGCTTTTCCTTTTCATTTATCT                        |
| 120                      | Forward: TTTGGTTGATGTTGTTGCATC<br>Reverse: GGGAAATAAGAAAAACAATGCT                                     |
| SIUC-SAT143 <sup>1</sup> | Forward: TGTTACTTAGTAATTATGAAG<br>Reverse: AATAATGATTTGTTGATCGAT                                      |
| SIUC-SAT185              | Forward: CAGAGTCAAGTTTGAAC TTCAT<br>Reverse: AATCAAGTGATCATTG TACTG                                   |
| 375752                   | Forward: GCTGCCTCAATTCAACAATCC<br>Reverse: TTGGTGTCATGTCTTGCTCTC                                      |

#### ***GmSHMT08* sequencing**

|                    |                                                                  |
|--------------------|------------------------------------------------------------------|
| SHMT <sup>1</sup>  | Forward: ACAACACTCTCTTCTCTCGC<br>Reverse: CAGATTATGAGTTTTGGCCTG  |
| SHMT2 <sup>1</sup> | Forward: CAGGCCAAAAC TCATAATCTG<br>Reverse: CGTTACCAATTCGCACTCCA |
| SHMT3 <sup>1</sup> | Forward: TAATTTGGTTGGAGAACAATG<br>Reverse: CTAATCCTTGACTTCATTTTC |

#### ***GmSNAP18* sequencing**

|       |                                                                               |
|-------|-------------------------------------------------------------------------------|
| SNAP1 | Forward: CGCTTATGAATCTTCTTCTTCTTC<br>Reverse: GCATGTAGTGGTAACAAC T GAGAC      |
| SNAP2 | Forward: GGTTTTGGAGTGGGCTGAATC<br>Reverse: ACCCAGGAGAAGAGATATCAATA            |
| SNAP3 | Forward: GCAGGAGCAAATTATTTTGCTGTC<br>Reverse: GAATTTGATGACACGTACAATAAATG      |
| SNAP4 | Forward: CACTGTGTAAAGTTAATTTTTTGCTTAC<br>Reverse: CCAATTC AATTA AAACCAAAGCAGG |

### **III. Primers for cDNA sequencing**

|                    |                                                                           |
|--------------------|---------------------------------------------------------------------------|
| Glyma18g02570-cDNA | Forward: ATGCGCGCCCTAGCAGCTCA<br>Reverse: TCATGATGGCACATCATATCTGAG        |
| Glyma18g02580-cDNA | Forward: ATGTCTCCGCGCCGGAGA<br>Reverse: TCATGACTTGCTACTAAAAGCATTAT        |
| Glyma18g02590-cDNA | Forward: CGCTTATGAATCTTCTTCTTCTTC<br>Reverse: CCAATTC AATTA AAACCAAAGCAGG |

### **IV. Primers for subcloning**

---

|                                       |                                                   |
|---------------------------------------|---------------------------------------------------|
| GmSNAP18-F<br>(Forrest/Essex/PI88788) | AAAAAAGCAGGCTAT ATG GCC GAT CAG TTA TCG AA        |
| GmSNAP18-Forrest-R                    | AAGAAAGCTGGGTCTCA AGT AAT AAC CTC ATA CTC CTC     |
| GmSNAP18-PI88788-R                    | AAGAAAGCTGGGTC TCA AGT AAT AGC CTC ATG CTG CTC    |
| GmSNAP18-Essex-R                      | AAGAAAGCTGGGTCTCA AGT AAG ATC ATC CTC CTC         |
| GmAAT-F                               | AAAAAAGCAGGCTTA GAAGGAGATAGAACCATGTCTCCGGCCCGGAGT |
| GmAAT-R                               | AAGAAAGCTGGGTC TTA TGA CTT GCT ACT AAA AGC ATT    |
| attB1-F                               | GGGGACAAGTTTGTACAAAAAAGCAGGCT                     |
| attB2-R                               | GGGGACCACTTTGTACAAGAAAGCTGGGT                     |

---

#### V. Primers for VIGS

---

|              |                                       |
|--------------|---------------------------------------|
| GmSNAPVIGS-F | CGCGGATCCCTCGAGATCCAACATTTTCAGGAACACG |
| GmSNAPVIGS-R | CGCGGATCCCCAGTTCCTGATATCGTTCTAA       |

---

#### VI. Primers for qRT-PCR

---

|               |                            |
|---------------|----------------------------|
| GmSNAP18-RT-F | ACAAGGCTGGAGCGACATAC       |
| GmSNAP18-RT-R | AGCAATGTGCAGCATCGACA       |
| qGm18AAT-F    | GGTTTGGAATTCCTACTGGTGGAA   |
| qGm18AAT-R    | CAATACCAATGGAAGCATAACAAAGA |
| GmUbiquitin-F | GTGTAATGTTGGATGTGTTCCC     |
| GmUbiquitin-R | ACACAATTGAGTTCAACACAAACCG  |

---

**Supplementary Table 2 Direct identification of *rhg1* candidate gene *GmSNAP18* conferring resistance to SCN by analysis of the polymorphisms possibly associated with the alleles underlying resistance to SCN.** The results indicate that gene Glyma18g02590 (*GmSNAP18*) is the candidate gene most possibly associated with the resistance to SCN at *rhg1*, in which those 6 SNPs (C163208A, C163225G, G164965C, G164968T, G164968C and C164974A) and 4 insertions (A164972AGGT and A164972AGGC) are all located within the exons, leading to the amino acid (AA) changes of predicted GmSNAP18 protein.

| Gene                                       | SNPs/Insertions | Total AA changes | AA (nucleotide) changes in Forrest/Peking                                                                                               | AA (nucleotide) changes in PI88788                                                                                                                             |
|--------------------------------------------|-----------------|------------------|-----------------------------------------------------------------------------------------------------------------------------------------|----------------------------------------------------------------------------------------------------------------------------------------------------------------|
| Glyma18g02353                              | 1               | 1                | 1                                                                                                                                       | -                                                                                                                                                              |
| Glyma18g02420                              | 1               | 1                | 1                                                                                                                                       | -                                                                                                                                                              |
| Glyma18g02450                              | 3               | 3                | 3                                                                                                                                       | -                                                                                                                                                              |
| Glyma18g02520                              | 1               | 1                | -                                                                                                                                       | 1                                                                                                                                                              |
| <b>Glyma18g02590<br/>(<i>GmSNAP18</i>)</b> | <b>10</b>       | <b>9</b>         | <b>3+2</b><br><b>D208E (C163225G)</b><br><br><b>D286Y (G164968T)</b><br><b>D287E and -288V (A164972AGGT)</b><br><b>L289I (C164974A)</b> | <b>4+2</b><br><b>Q203K (C163208A)</b><br><b>E285Q (G164965C)</b><br><b>D286H (G164968C)</b><br><b>D287E and -288A (A164972AGGC)</b><br><b>L289I (C164974A)</b> |
| Glyma18g02650                              | 1               | 1                | 1                                                                                                                                       | -                                                                                                                                                              |
| Glyma18g02660                              | 1               | 1                | 1                                                                                                                                       | -                                                                                                                                                              |
| Glyma18g02681                              | 1               | 1                | 1                                                                                                                                       | -                                                                                                                                                              |
| Glyma18g02690                              | 3               | 3                | 3                                                                                                                                       | -                                                                                                                                                              |
| Glyma18g02700                              | 1               | 1                | 1                                                                                                                                       | -                                                                                                                                                              |
| Glyma18g02720                              | 2               | 2                | -                                                                                                                                       | 2                                                                                                                                                              |
| Glyma18g02741                              | 1               | 1                | -                                                                                                                                       | 1                                                                                                                                                              |



**Supplementary Table 3 The primers specific for the enrichment of the 300 kb regional genomic DNA segment at *rhg1* by RSE.**

| No.     | Primers (5'>3')             | No.     | Primers (5'>3')           |
|---------|-----------------------------|---------|---------------------------|
| Gm18-1  | ctctatcgactctcagtctc        | Gm18-31 | cctggaacaagccatgttc       |
| Gm18-2  | acatacaatataagcctgcgaag     | Gm18-32 | cgtgacacacctctgtctaa      |
| Gm18-3  | cgccttgtgcaaaagaagat        | Gm18-33 | cccaaactgaaagcgtgaag      |
| Gm18-4  | actaacgccacttaccacca        | Gm18-34 | gtgtaatgaatggacggctcc     |
| Gm18-5  | tgactacgatgtcactgac         | Gm18-35 | agagtattatgaacggcgtct     |
| Gm18-6  | ccaatceccacctcaggtaa        | Gm18-36 | gacttcgcaaatccaagacg      |
| Gm18-7  | ccagactcaagtctaagctc        | Gm18-37 | ggggtgtcaagacaatctag      |
| Gm18-8  | gaacgacactgatatgctgg        | Gm18-38 | gacacaaaaggctgtttcc       |
| Gm18-9  | ctagtgtctgcatcatcaca        | Gm18-39 | gcagttcttagctgttctg       |
| Gm18-10 | ccgaagttaggaaagaaggg        | Gm18-40 | cctgaatttctggtaaagcaag    |
| Gm18-11 | gaactcttgaatgcttctcga       | Gm18-41 | gcagctattccagttctgtt      |
| Gm18-12 | gctctataaatagagcattcgtagtct | Gm18-42 | ggggagttaaacacctcctc      |
| Gm18-13 | gttggtccctagaatatctga       | Gm18-43 | ccttatcatcaaccgcaaca      |
| Gm18-14 | gcatcggaatgaacgctaac        | Gm18-44 | gaacagcacggctatcatca      |
| Gm18-15 | cgaggatcaggatgattttg        | Gm18-45 | ctcactttggtagtagctc       |
| Gm18-16 | cctgtgtagtaactagtaac        | Gm18-46 | gtagccatggatcgaatgaag     |
| Gm18-17 | cacgtacacccatattctga        | Gm18-47 | gtgtctcagaaccagttag       |
| Gm18-18 | agtaggggtacgggtatgag        | Gm18-48 | aacggataacaagacagaaagaa   |
| Gm18-19 | ctttcgttttcttagcacatgtctt   | Gm18-49 | gttacacgagtcaggaccat      |
| Gm18-20 | gcttctagaagtaaaactaacga     | Gm18-50 | aacaaggttgcctgcaagtc      |
| Gm18-21 | cattcaggcactactaaactgttgc   | Gm18-51 | ctttgcattagcgagaaaatttgg  |
| Gm18-22 | ctcaaggaggaggaaagtgat       | Gm18-52 | tcatcttctgatggaggct       |
| Gm18-23 | tttatcatggcctaggcctacca     | Gm18-53 | ccggacttaggataactaaaacaag |
| Gm18-24 | ccatcacggcatctttaaatttacc   | Gm18-54 | catgggaggaatgaacgctgga    |
| Gm18-25 | ccgtatgagaccgcatatt         | Gm18-55 | cgtaaccttactttataccatac   |
| Gm18-26 | tgatgatttttagcggctcag       | Gm18-56 | gggcttagcttaggcattata     |
| Gm18-27 | tgcgttaagagatgatccag        | Gm18-57 | ccgaggtggactttgattctct    |
| Gm18-28 | acatcaggcaattcccgtag        | Gm18-58 | gtccctcaaaggcattcttt      |
| Gm18-29 | cagcattcctcatatggagtg       | Gm18-59 | cgagtggactaagtctctta      |
| Gm18-30 | cattaaataggtcgcctaca        | Gm18-60 | tccgtgaatgattgacaagg      |

### Supplementary References

1. Liu, S., Kandath, P.K., Warren, S.D., Yechel, G., Heinz, R., Alden, J., Yang, C., Jamai, A., Ei-Mellouki, T., Juvale, P.S., Hill, J., Baum, T.J., Cianzio, S., Whitham, S.A., Korkin, D., Mitchum, M.G. & Meksem, K. A soybean cyst nematode resistance gene points to a new mechanism of plant resistance to pathogens. *Nature* **492**, 256-260 (2012).
2. Hyten, D.L., Choi, I.Y., Song, Q., Shoemaker, R.C., Nelson R.L., Costa, J.M., Specht, J.E. & Cregan, P.B. Highly variable patterns of linkage disequilibrium in multiple soybean populations. *Genetics* **175**, 1937-1944 (2007).

3. Hwang T.Y., Sayama, T., Takahashi, M., Takada, Y., Nakamoto, Y., Funatsuki, H., Hisano, H., Sasamoto, S., Sato, S., Tabata, S., Kono, I., Hoshi, M., Hanawa, M., Yano, C., Xia, Z., Harada, K., Kitamura, K. & Ishimoto, M. High-density integrated linkage map based on SSR markers in soybean. *DNA Res.* **16**, 213-225 (2009).
4. <http://soybase.org>
